# Supplementary material for: SNHG17 promotes the proliferation and migration of colorectal adenocarcinoma cells by modulating CXCL12-mediated angiogenesis
Source: Cancer Cell Int. 2020 Nov 26;20:566. doi: 10.1186/s12935-020-01621-0 (PMC7690009; doi:10.1186/s12935-020-01621-0)
Supplement: Supplementary file 1 — Additional file 1: Table S1. Sequences for PCR primers and transfection plasmids. [file 12935_2020_1621_MOESM1_ESM.xlsx]

## Sheet: Sheet1
Sequences for PCR primers
SNHG17	F GAGACACTGCACCAAGGACA
	R GCACCCCATCTCTCGAAAT
CXCL12	F GCCAAAGACGGATCTCACA
	R CCCCTCTCCCAGCTATTCCT
miR-23a-3p	F AGATCACATTGCCAGGGAT
	R GGTCCAGTTTTTTTTTTTTTTTGGAA
GAPDH	F GGAGCGAGATCCCTCCAAAAT
	R GGCTGTTGTCATACTTCTCATGG
U6	F CTCGCTTCGGCAGCACA
	R AACGCTTCACGAATTTGCGT
Sequences for transfection plasmds
sh/NC	5’-CCGGCATGACTCATCTACATACACTCTCGAGAGTGTATGTAGATGAGTCATGTTTTTG-3'
sh/SNHG17#1	5'-CCGGATGACAAGAAGCCACACATATCACTCGAGTGATATGTGTGGCTTCTTGTCATTTTTTG-3'
sh/SNHG17#2	5'-CCGGCACACATATCACTTCTTATAACACTCGAGTGTTATAAGAAGTGATATGTGTGTTTTTG-3'
NC mimics	5'-GGAUCCCCUACCUGAGAAUUU-3'
MiR-23a-3p mimics	5'-AUCACAUUGCCAGGGAUUUCC-3'
NC inhibitor	5'-GGAUCCCCUACCUGAGAAUUU-3'
MiR-23a-3p inhibitor	5'-GGAAAUCCCUGGCAAUGUGAU-3'
Sequence for SNHG17 FISH probe	uggagcaauucuguaagguuuauugaauggguggguaaaaagugaacgacagcuacaaauucaaaaauaaaacucuugguuauuaaagucauuccaggcauggacagagggaugcgaggcuggccuucccuguccacgguccucugaggcagcugaagucucccaugucuggaccccgaaucuugugcagauugaacaguggauccggggugcucugagcaggcagcagggagcagcucuggugacgcuucaugugguagccucacucuccauucucugccccucucgugcccacaaacaccaccaagagauucacggugagaaauaucagcaaacccagaucccagaucaccaacuccauggucuuaggacuuccuuggacuguccuuggaucuaagg…
